# Supplementary material for: VceC Mediated IRE1 Pathway and Inhibited CHOP-induced Apoptosis to Support Brucella Replication in Goat Trophoblast Cells
Source: MDPI journal article supplement (doi:10.3390/ijms20174104), 2019-08-22
Supplement: s1 [file s1]

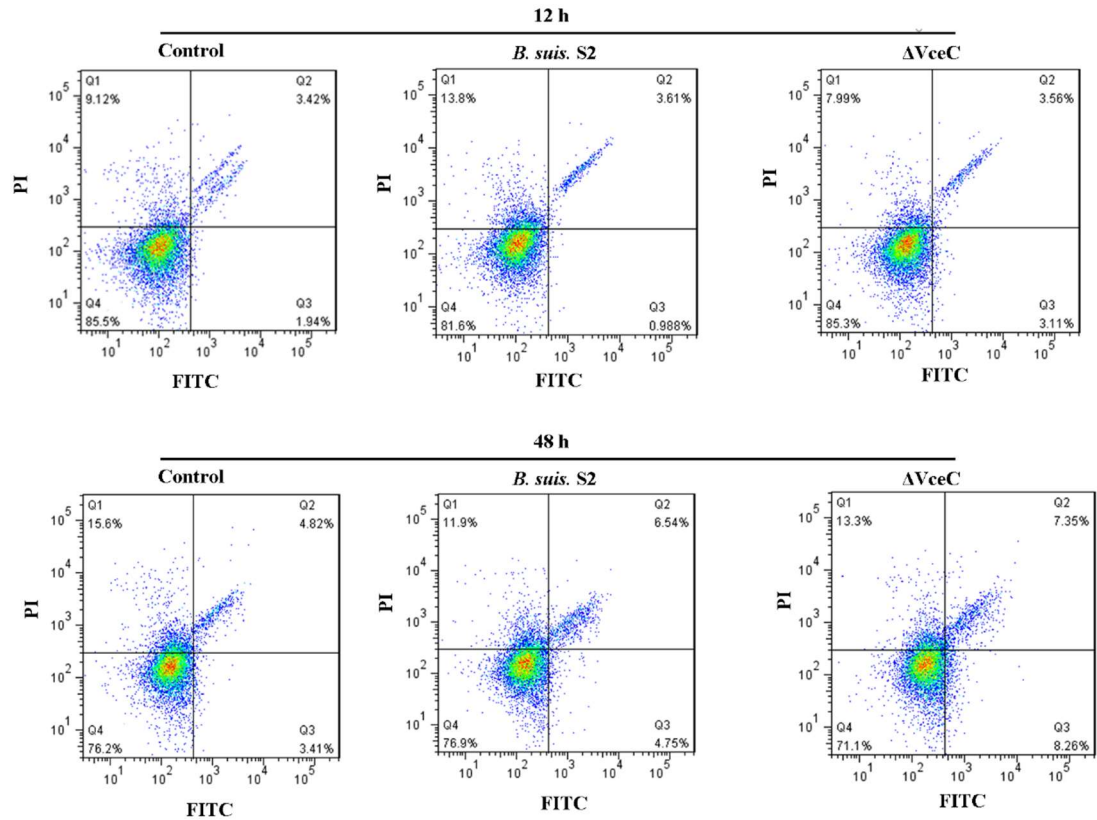

Supplementary figure 1 Results of cell apoptosis after *B.suis*.S2 and  $\Delta$ VceC infection at 12 h and 48 h. To assess cell death in vitro, GTCs cells were infected with *B.suis*.S2 or  $\Delta$ VceC for 12 h and 48 h; the cells were then subjected to Annexin V-FITC/PI staining and analyzed by flow cytometry. All experiments were repeated three times with similar results.
